# Supplementary material for: Uniaxial negative thermal expansion in the [(CH3)2NH2]PbBr3 hybrid perovskite
Source: Royal Society of Chemistry journal article supplement (doi:10.1039/d2tc02708a), 2022-01-01
Supplement: d2tc02708a1.pdf [file d2tc02708a1.pdf]

## Supporting information

### Uniaxial negative thermal expansion in $[(\text{CH}_3)_2\text{NH}_2]\text{PbBr}_3$ hybrid perovskite

Juan S. Rodríguez-Hernández,<sup>a</sup> Mayra A. P. Gómez,<sup>a</sup> D. S. Abreu,<sup>b</sup> Ariel Nonato,<sup>c</sup> Rosivaldo Xavier da Silva,<sup>d</sup> Alberto García-Fernández,<sup>e</sup> María A. Señarís-Rodríguez,<sup>e</sup> Manuel Sánchez Andújar,<sup>e</sup> A. P. Ayala,<sup>a</sup> and C.W.A. Paschoal <sup>\*a</sup>

<sup>a</sup>Departamento de Física, Universidade Federal do Ceará, Campus do Pici, 65455-900, Fortaleza - CE, Brazil.

<sup>b</sup>Laboratório de Espectroscopia Molecular, Departamento de Química Fundamental, Instituto de Química, Universidade de São Paulo, 05508-000, São Paulo – SP, Brasil

<sup>c</sup>Coordenação de Ciências Naturais, Universidade Federal do Maranhão, Campus do Bacabal, 65700-000, Bacabal - MA, Brazil.

<sup>d</sup>Coordenação de Ciências Naturais, Universidade Federal do Maranhão, Campus de Codó, 65400-000, Codó - MA, Brazil.

<sup>e</sup>Universidade da Coruña, Quimolmat, Centro de Investigacións Científicas Avanzadas (CICA), Rúa As Carballeiras, 15071, A Coruña, Spain.

\*Corresponding author: C.W.A. Paschoal – paschoal.william@fisica.ufc.br.

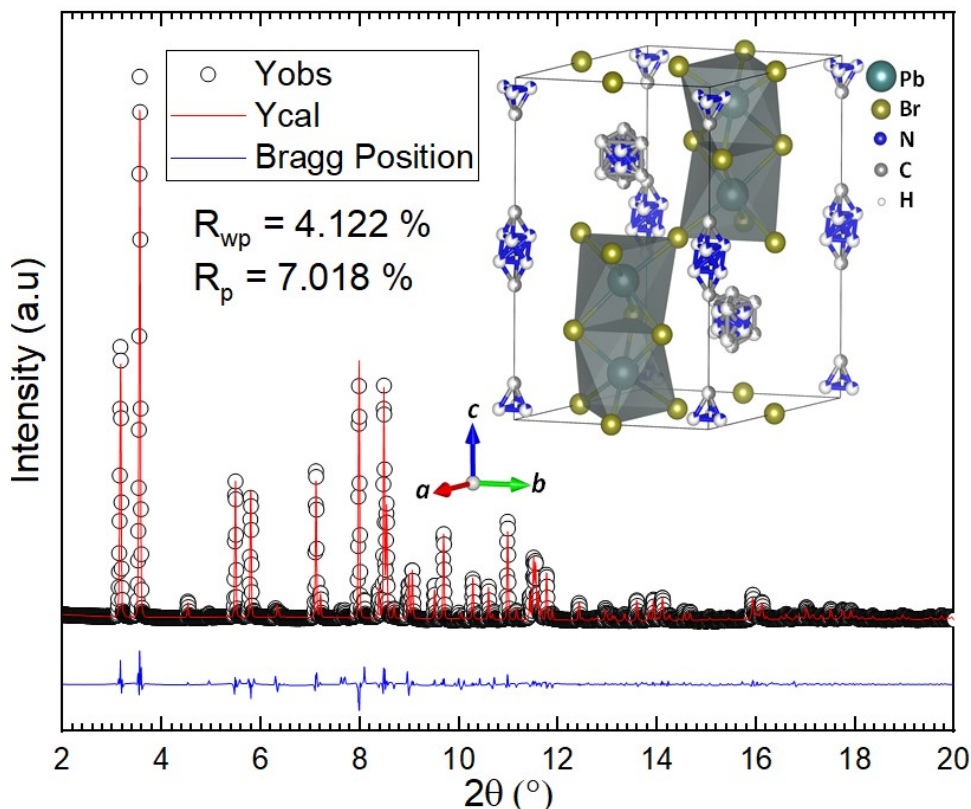

**Figure S1** - Le Bail refinement of the  $P6_3/mmc$  at 330 K with the ICSD code 402591.

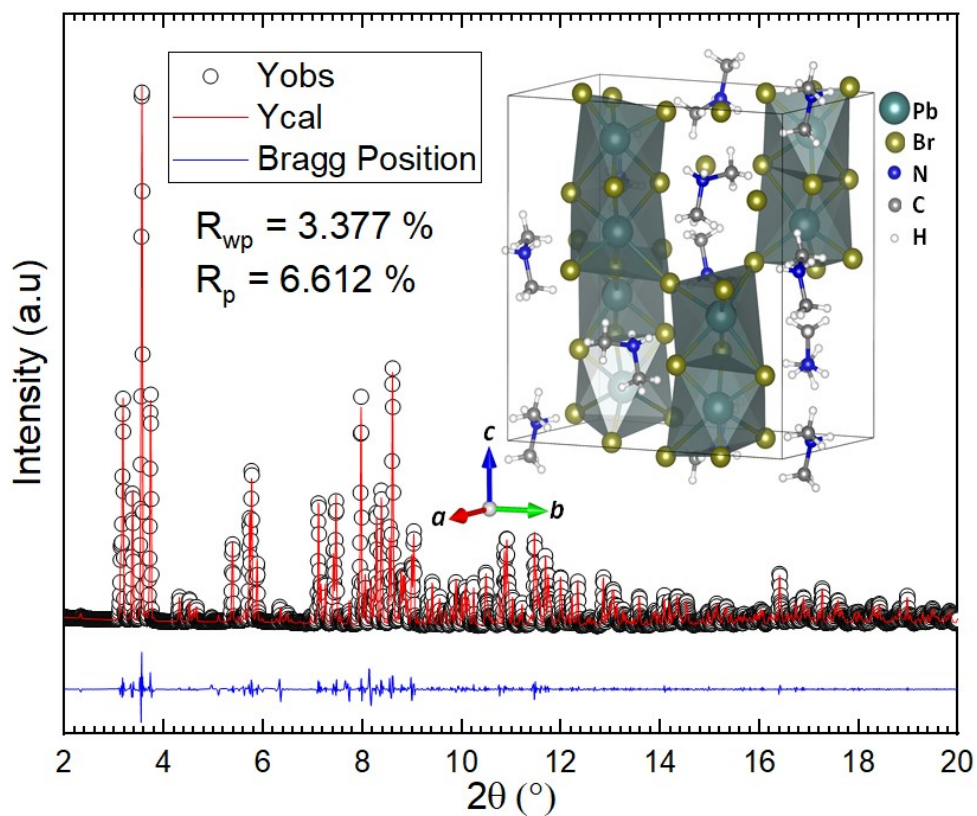

Figure S2 - Le Bail refinement of the  $P2_12_12_1$  at 130 K with the CCDC code 1855520.

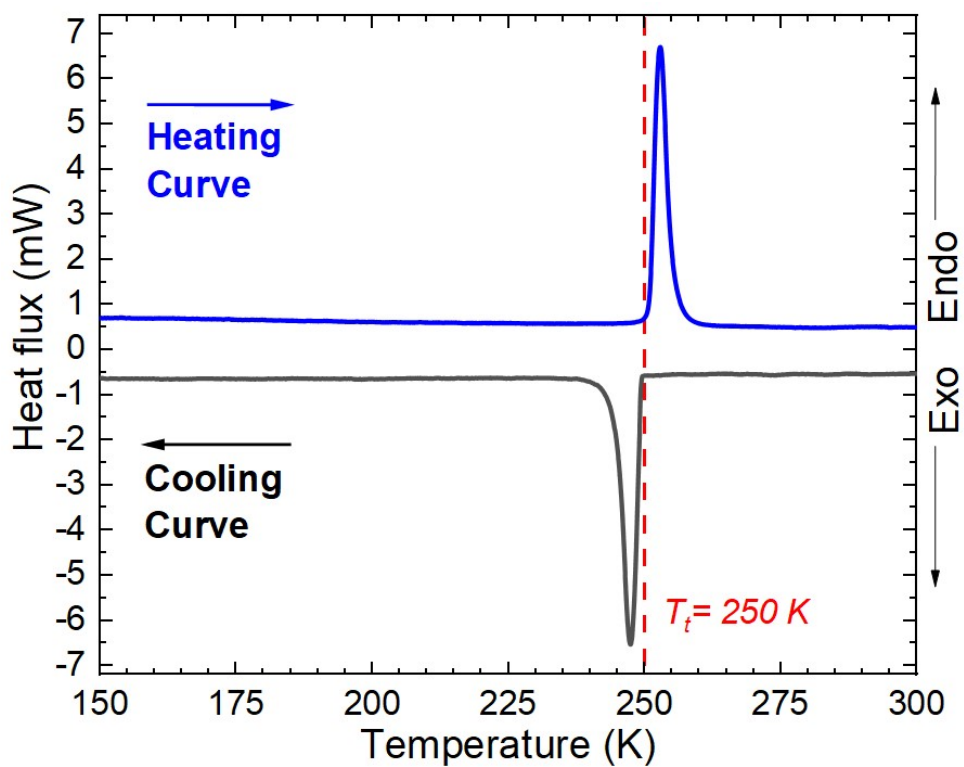

Figure S3 - DSC results as a function of temperature obtained by heating and cooling cycles of the  $\text{DMAPbBr}_3$  sample at  $5\text{K}\cdot\text{min}^{-1}$  in the 150-300K range.

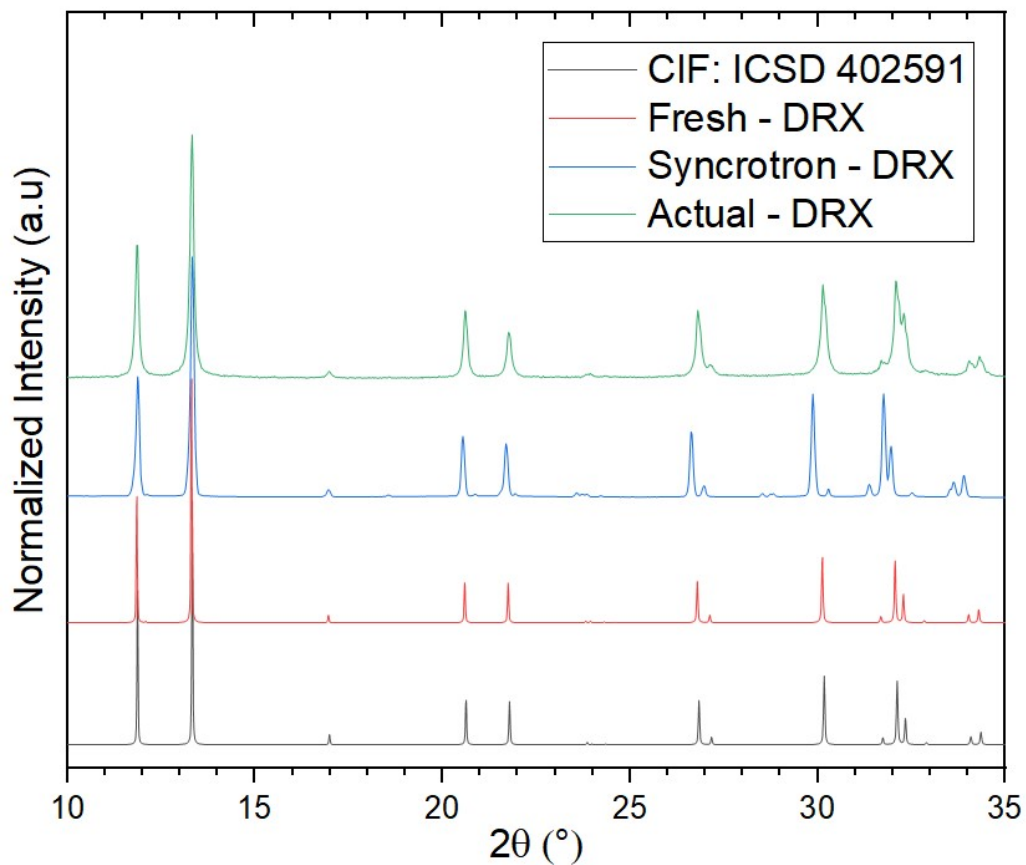

**Figure S4.** PXRD pattern obtained at room temperature for the polycrystalline sample DMAPbBr<sub>3</sub> after the synthesis, a few months at the synchrotron, and the actual date at ambient conditions, compared with the profile obtained from the single crystal structure from the ICSD 402591 code.
